# Supplementary material for: Effects of Light Intensity on Physiological Characteristics and Expression of Genes in Coumarin Biosynthetic Pathway of Angelica dahurica
Source: MDPI journal article supplement (doi:10.3390/ijms232415912), 2022-12-14
Supplement: s1 [file s1]

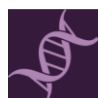

## Supplementary Materials

**Table S1.** Sequencing data of *A. dahurica* roots in different shading treatment.

| Sample | Clean reads | Clean base | GC Content | Q30(%) |
|--------|-------------|------------|------------|--------|
| CK-1   | 43958162    | 6349617042 | 43.34      | 93.72  |
| CK-2   | 43881308    | 6334760866 | 44.03      | 93.87  |
| CK-3   | 59613146    | 8579749179 | 42.31      | 94.2   |
| L1-1   | 42026396    | 8579749179 | 43.44      | 93.72  |
| L1-2   | 43277064    | 6251278155 | 43.42      | 93.9   |
| L1-3   | 42981158    | 6242766797 | 43.4       | 93.78  |
| L2-1   | 48032450    | 7049899910 | 43.4       | 93.81  |
| L2-2   | 51661628    | 7598466542 | 43.67      | 93.85  |
| L2-3   | 51300598    | 7443134197 | 44.4       | 93.88  |
| L3-1   | 42632148    | 6216459055 | 44.08      | 93.57  |
| L3-2   | 49058844    | 7138566211 | 43.63      | 93.99  |
| L3-3   | 48815108    | 7139405562 | 43.74      | 93.82  |

**Table S2.** Assessment of the results of root *de novo* assembly of *A. dahurica* in different shading treatment.

| Type                 | Unigene   |
|----------------------|-----------|
| Total number         | 294362    |
| Total base           | 242418069 |
| Largest length (bp)  | 12050     |
| Smallest length (bp) | 201       |
| Average length (bp)  | 823.54    |
| N50 length (bp)      | 1331      |
| E90N50 length (bp)   | 1955      |
| Fragment mapped      | 87.912    |
| GC percent (%)       | 42.79     |

**Table S3.** Summary statistics of the annotations for *A. dahurica* root unigenes from six public databases.

| Database        | Number of unigenes | Percent (%) |
|-----------------|--------------------|-------------|
| GO              | 83018              | 41.02%      |
| KEGG            | 70589              | 34.88%      |
| eggNOG          | 100463             | 49.64%      |
| NR              | 101839             | 50.32%      |
| Swiss-Prot      | 89172              | 44.06%      |
| Pfam            | 95434              | 47.16%      |
| Total annotated | 127670             | 63.09%      |

**Table S7.** Basic physical and chemical properties of the tested soil.

| Soil type | SOM<br>(g·kg <sup>-1</sup> ) | TN<br>(mg·kg <sup>-1</sup> ) | TP<br>(g·kg <sup>-1</sup> ) | TP<br>(g·kg <sup>-1</sup> ) |
|-----------|------------------------------|------------------------------|-----------------------------|-----------------------------|
| Content   | 12.25                        | 1.15                         | 0.13                        | 10.28                       |

**Table S8.** Gene and primers used for the qRT-PCR validation.

| <b>Genes</b>           | <b>Former primer (5'-3')</b> | <b>Back primer (5'-3')</b> |
|------------------------|------------------------------|----------------------------|
| actin                  | GATTCGTTGCCCTGAGGTTCTG       | ACCACCACTGAGCAC-TATGTTTCC  |
| TRINITY_DN67351_c0_g1  | TTTTATGTCCGCATTATCAGG        | CGGGTTTCTG-TACAAAATCAGAC   |
| TRINITY_DN21272_c0_g1  | TATTAAAGGCATCAACTTCGAC       | CTTCAAGAATATGGCGTCTC       |
| TRINITY_DN10627_c0_g3  | GAAATTATTGGTCCGCTACCTG       | ATAATCCGAATACAAAATT-GCT    |
| TRINITY_DN114088_c0_g2 | AAGTAAACAGTGAACACGCAAA       | TCTGCACCAACTAGTACACC       |
| TRINITY_DN4536_c0_g3   | TTACATGATCGCCTGACGCCAA       | CTTAGCCTTCCAGCAAATGGGT     |
| TRINITY_DN78698_c0_g2  | GATTCGTTGCCCTGAGGTTCTG       | ACCACCACTGAGCAC-TATGTTTCC  |
| TRINITY_DN38381_c1_g1  | TAATCCGACAGCATTCTTGGAC       | AAATTTGAAACTATCGGAGCAC     |
| TRINITY_DN32963_c0_g1  | CGCCTTCCTAGCTTTTCGG          | AGCTGTAATGGTTAAGCCCAA      |
| TRINITY_DN40230_c0_g2  | ATTGCACCACCTGTGTTCGATG       | ATCATTTGCGTCCAAGTAAGCC     |
