# Supplementary material for: Effects of Light Intensity on Physiological Characteristics and Expression of Genes in Coumarin Biosynthetic Pathway of Angelica dahurica
Source: MDPI journal article supplement (doi:10.3390/ijms232415912), 2022-12-14

# Bar chart of GO

biological process

cellular component

molecular function

Percent of unigene

biological process  
cellular component  
molecular function

0.00 0.30 0.45 0.60

0 12468 24935 37403 49870

Number of unigene

cellular process  
metabolic process  
biological regulation  
cellular component organization or biogenesis  
localization  
response to stimulus  
developmental process  
reproductive process  
multicellular organismal process  
multi-organism process  
growth  
immune system process  
detoxification  
rhythmic process  
locomotion  
nitrogen utilization  
biological adhesion  
carbon utilization  
reproduction  
signaling  
cell part  
organelle  
membrane part  
protein-containing complex  
organelle part  
membrane  
cell  
cell junction  
extracellular region  
membrane-enclosed lumen  
supramolecular complex  
other organism part  
extracellular region part  
nucleoid  
binding  
catalytic activity  
structural molecule activity  
transporter activity  
translation regulator activity  
transcription regulator activity  
molecular function regulator  
antioxidant activity  
molecular transducer activity  
protein tag  
protein folding chaperone  
small molecule sensor activity  
molecular carrier activity  
nutrient reservoir activity  
toxin activity  
cargo adaptor activity  
cargo receptor activity

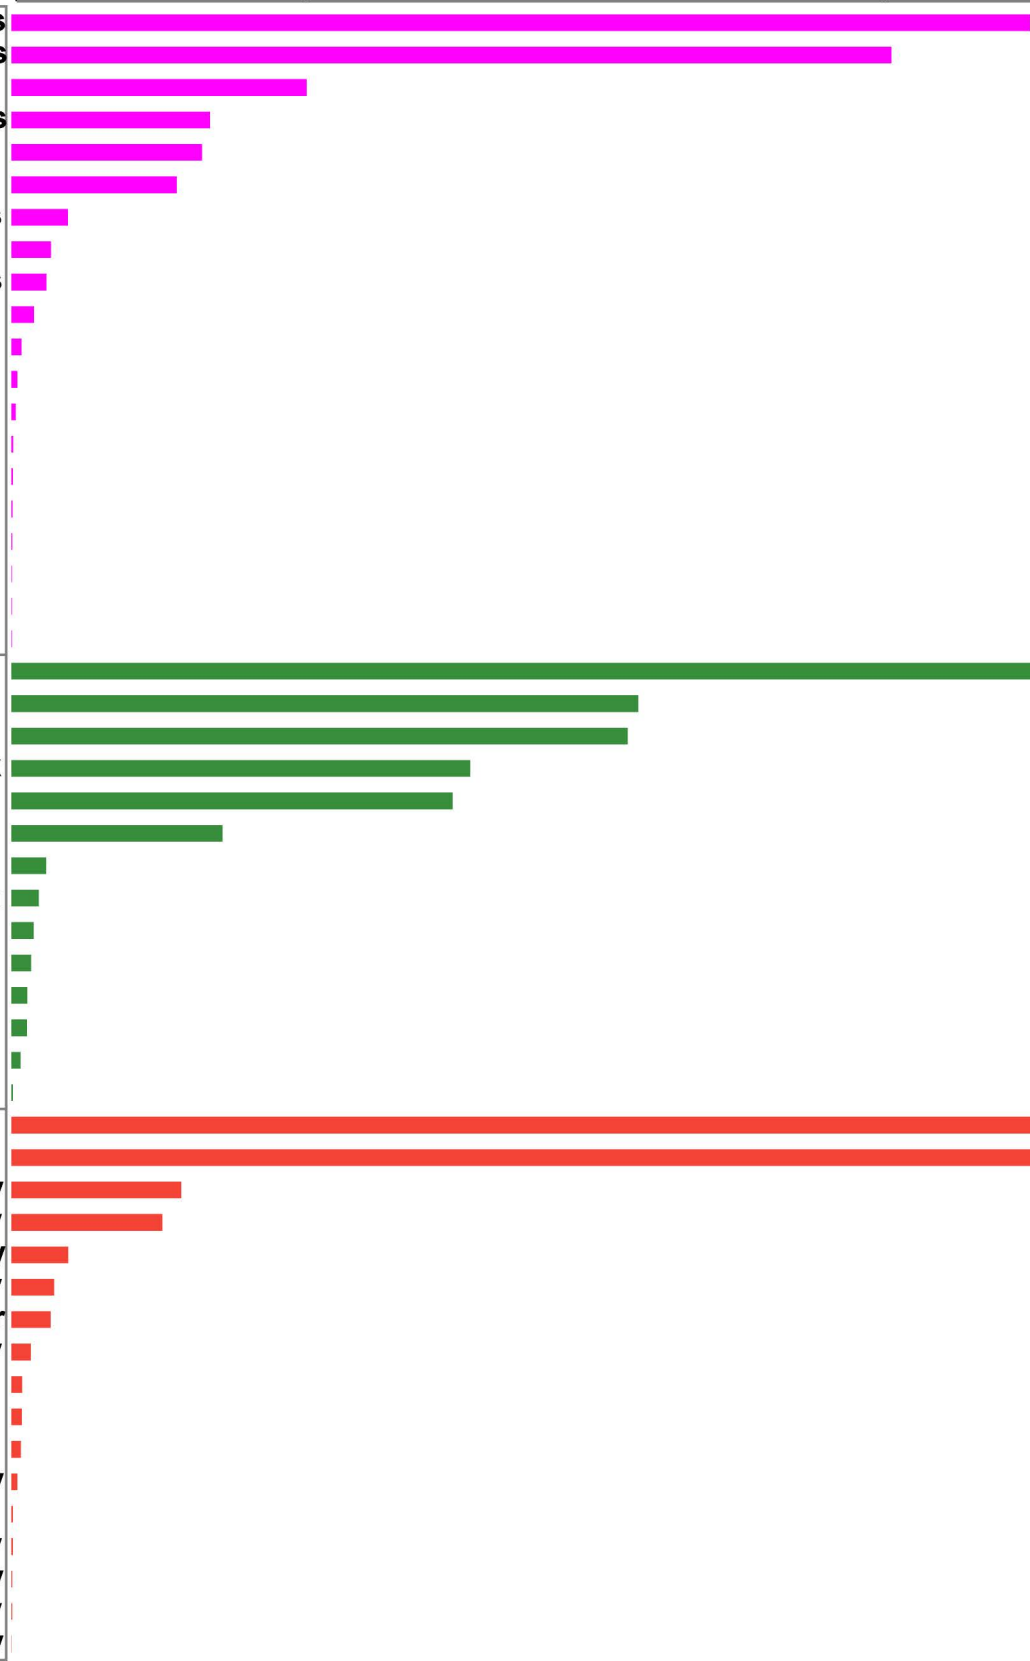

Supplement: s1 [file s1]
