# Supplementary figures and images for: Effects of Light Intensity on Physiological Characteristics and Expression of Genes in Coumarin Biosynthetic Pathway of Angelica dahurica
Source: MDPI journal article supplement (doi:10.3390/ijms232415912), 2022-12-14

# Gene functional classification (KEGG)

Number of unigenes

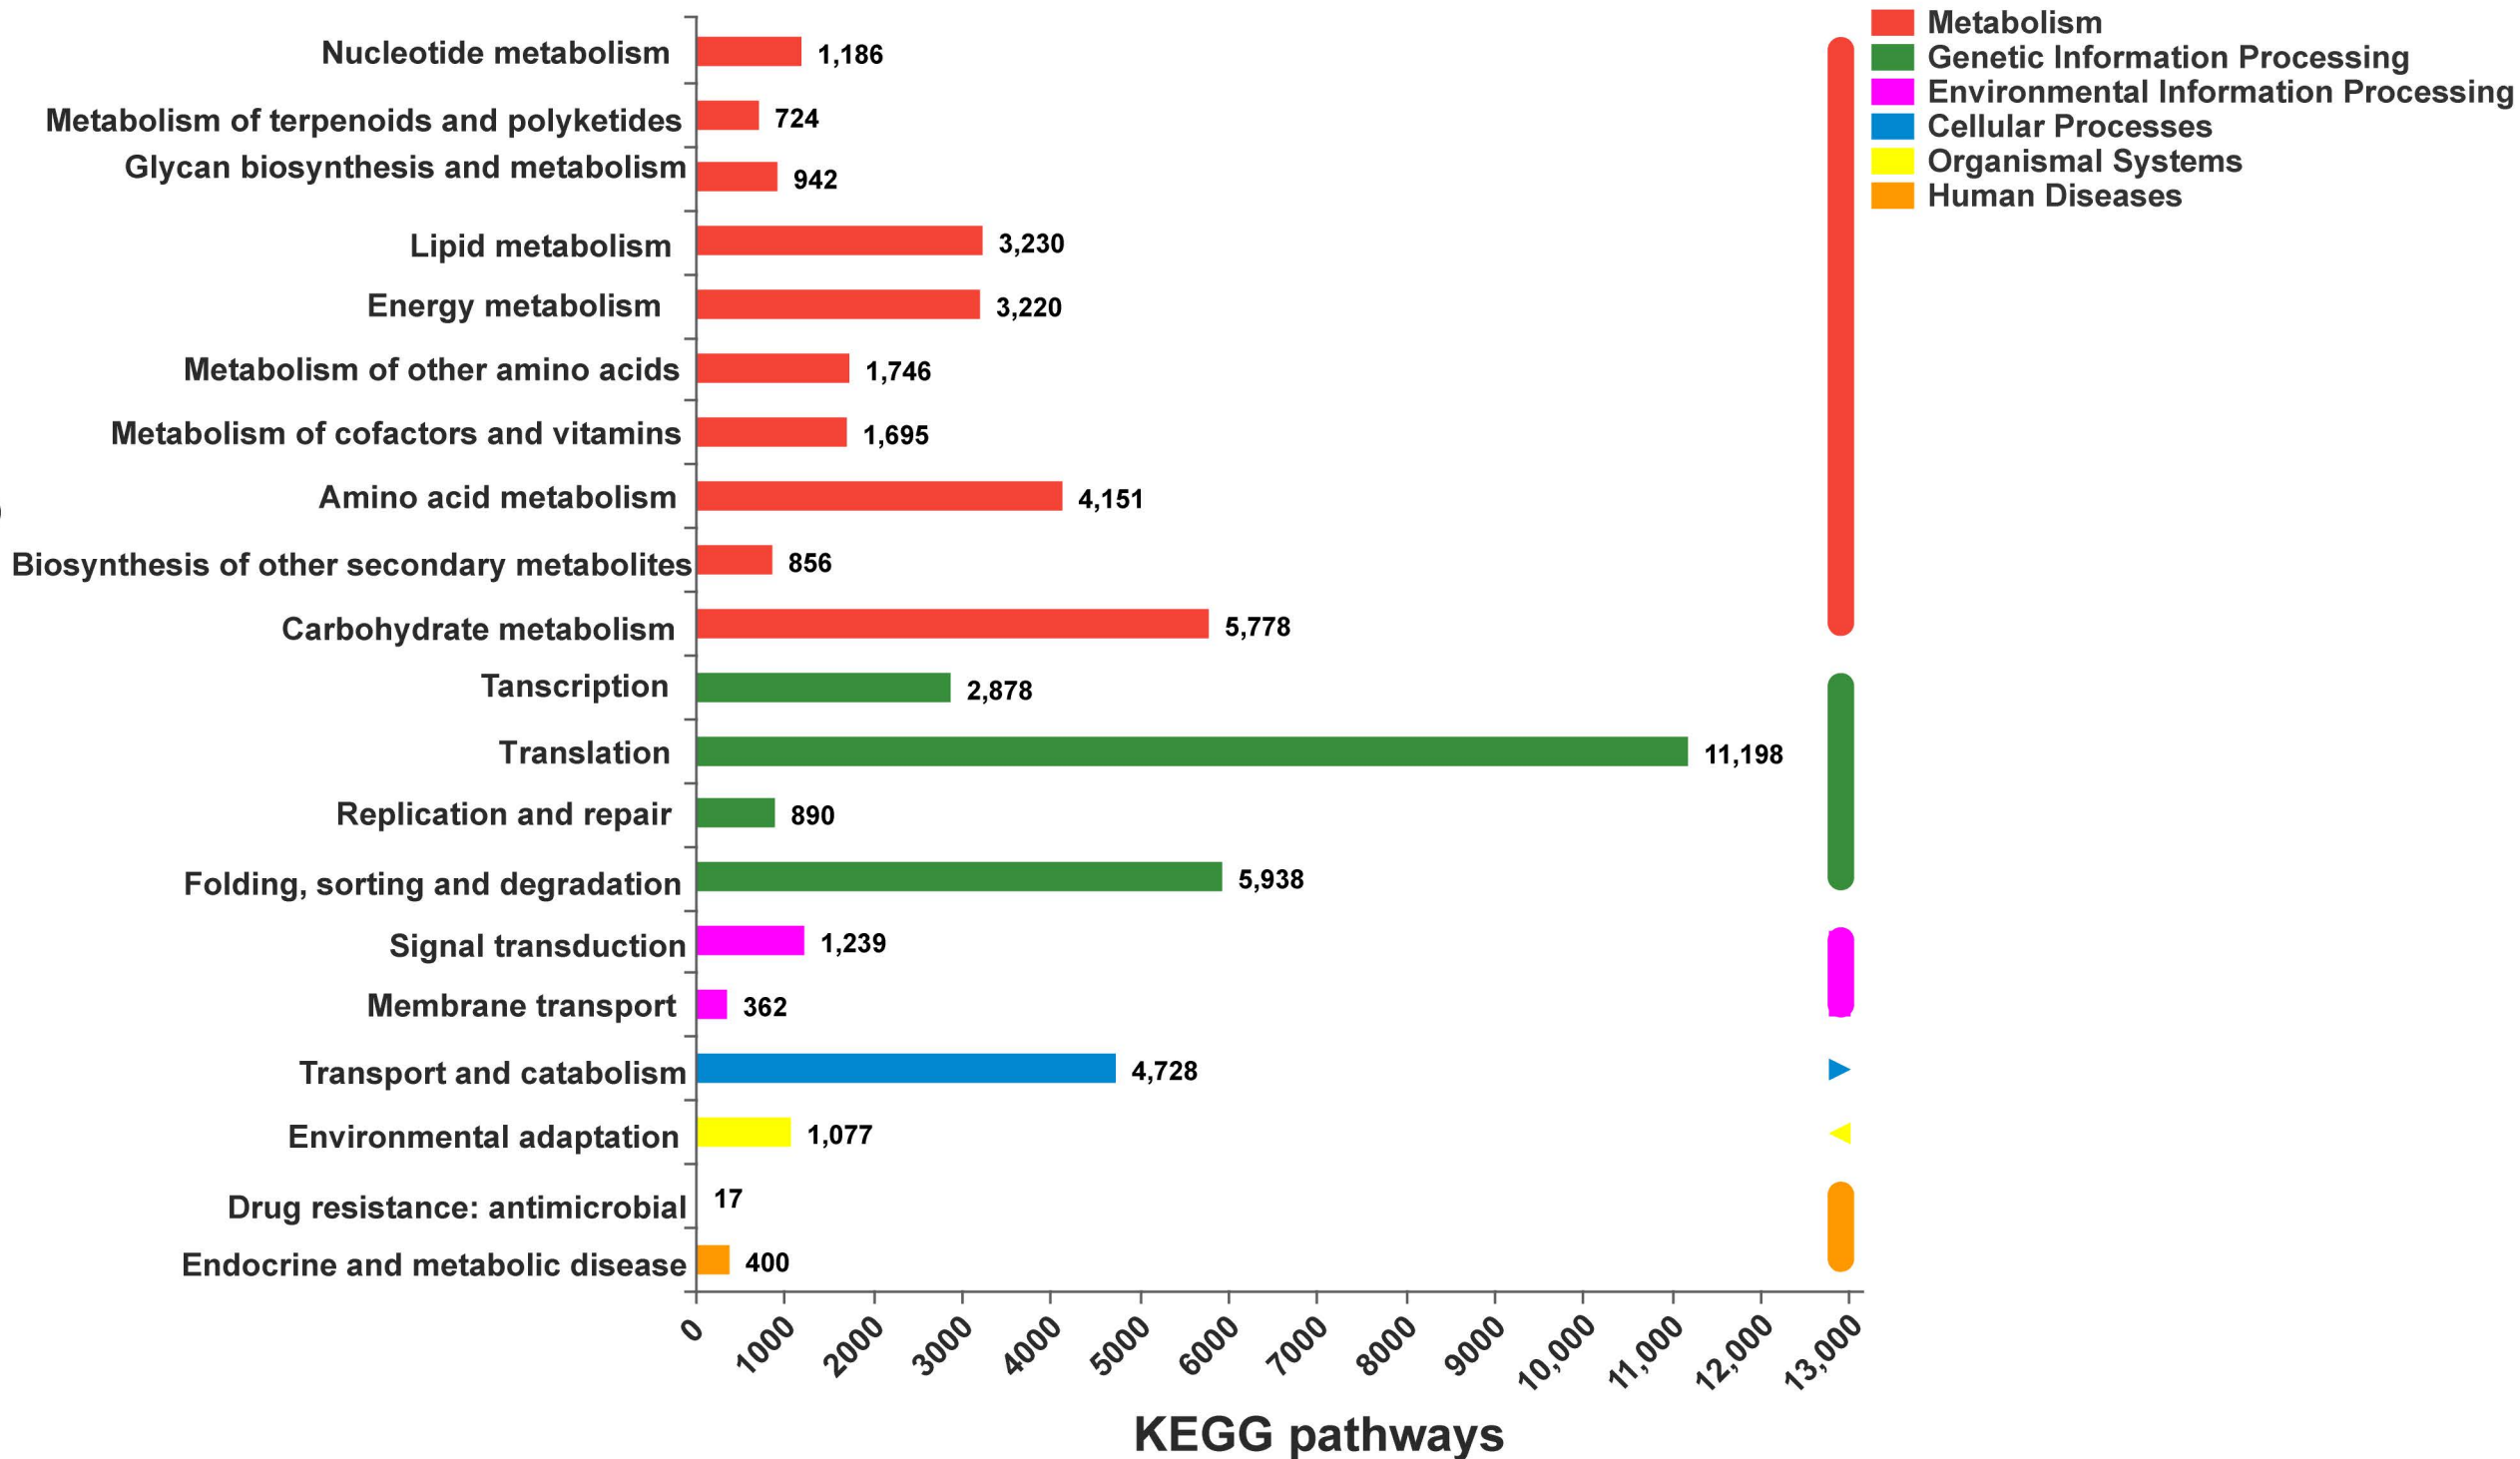

Supplement: s1 [file s1]

# Species Distribution

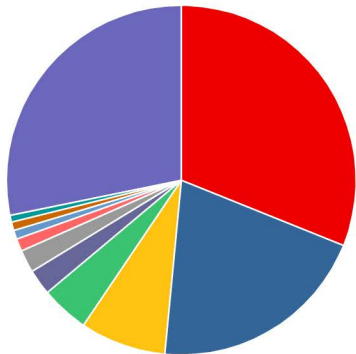

# Specices

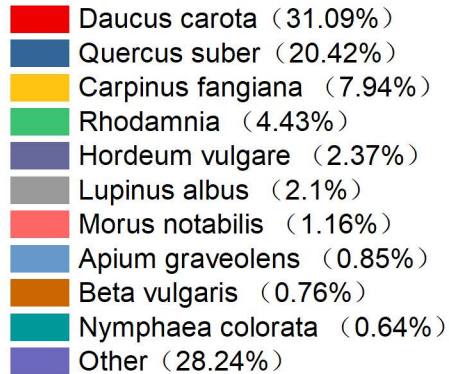

Supplement: s1 [file s1]

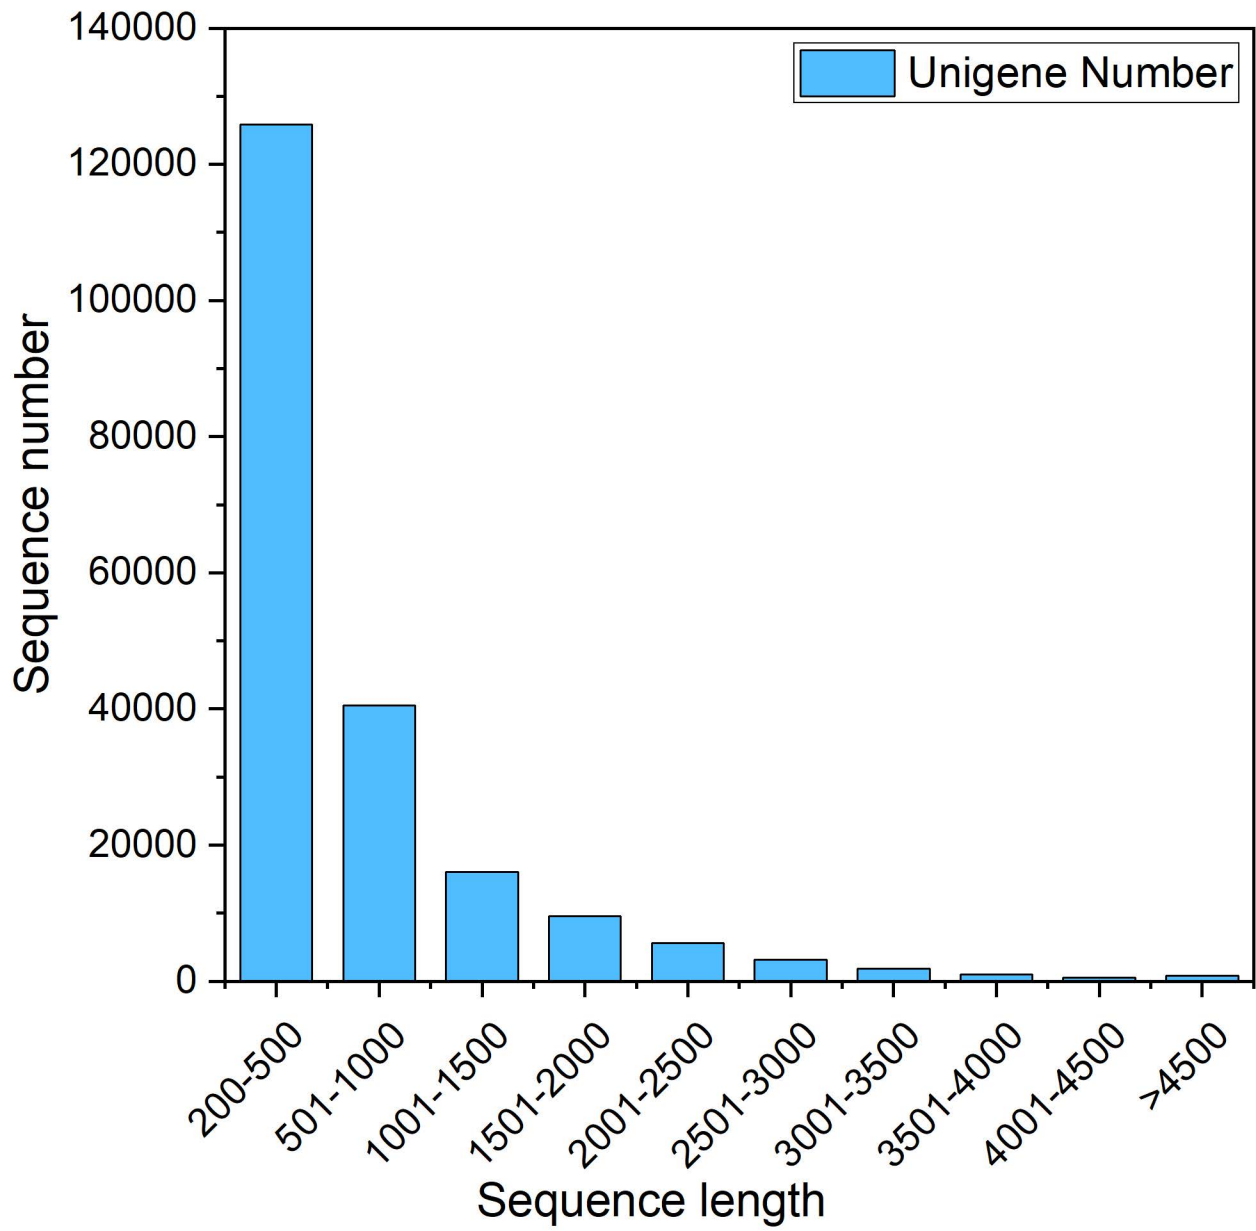

Supplement: s1 [file s1]
